# Supplementary material for: Prevalence of SARS-CoV-2 in six districts in Zambia in July, 2020: a cross-sectional cluster sample survey
Source: PubMed Central journal article supplement (PMC8382844; doi:10.1016/s2214-109x(21)00053-x), 2021-03-09
Supplement: NIHMS1733840-supplement-Appendix.pdf [file NIHMS1733840-supplement-Appendix.pdf]

# THE LANCET

## Global Health

### Supplementary appendix

This appendix formed part of the original submission and has been peer reviewed.  
We post it as supplied by the authors.

Supplement to: Mulenga LB, Hines JZ, Fwoloshi S, et al. Prevalence of SARS-CoV-2 in six districts in Zambia in July, 2020: a cross-sectional cluster sample survey. *Lancet Glob Health* 2021; published online March 9. [https://doi.org/10.1016/S2214-109X\(21\)00053-X](https://doi.org/10.1016/S2214-109X(21)00053-X).

**Appendix - Prevalence of Severe Acute Respiratory Syndrome Coronavirus 2 (SARS-CoV-2) Infection in Six Districts in Zambia—July 2020: a cross-sectional multi-stage cluster-sampled household survey**

**Contents**

*Supplemental Figure 1.* Laboratory-confirmed COVID-19 cases by date of confirmation in Zambia, with dates of prevalence study overlaid—Zambia, March-December 2020 ..... 2

*Supplemental Figure 2.* Geographic location and data collection time period of SARS-CoV-2 prevalence survey—Zambia, July 2020 ..... 3

*Supplemental Figure 3.* Flow diagram of sample sizes in the SARS-CoV-2 prevalence study in six districts in Zambia, July 2020 ..... 4

*Supplemental Table.* Symptomology of persons with symptomatic SARS-CoV-2 infections during SARS-CoV-2 prevalence study — Zambia, July 2020 ..... 5

Supplemental Figure 1. Laboratory-confirmed COVID-19 cases by date of confirmation in Zambia, with dates of prevalence study overlaid— Zambia, March-December 2020

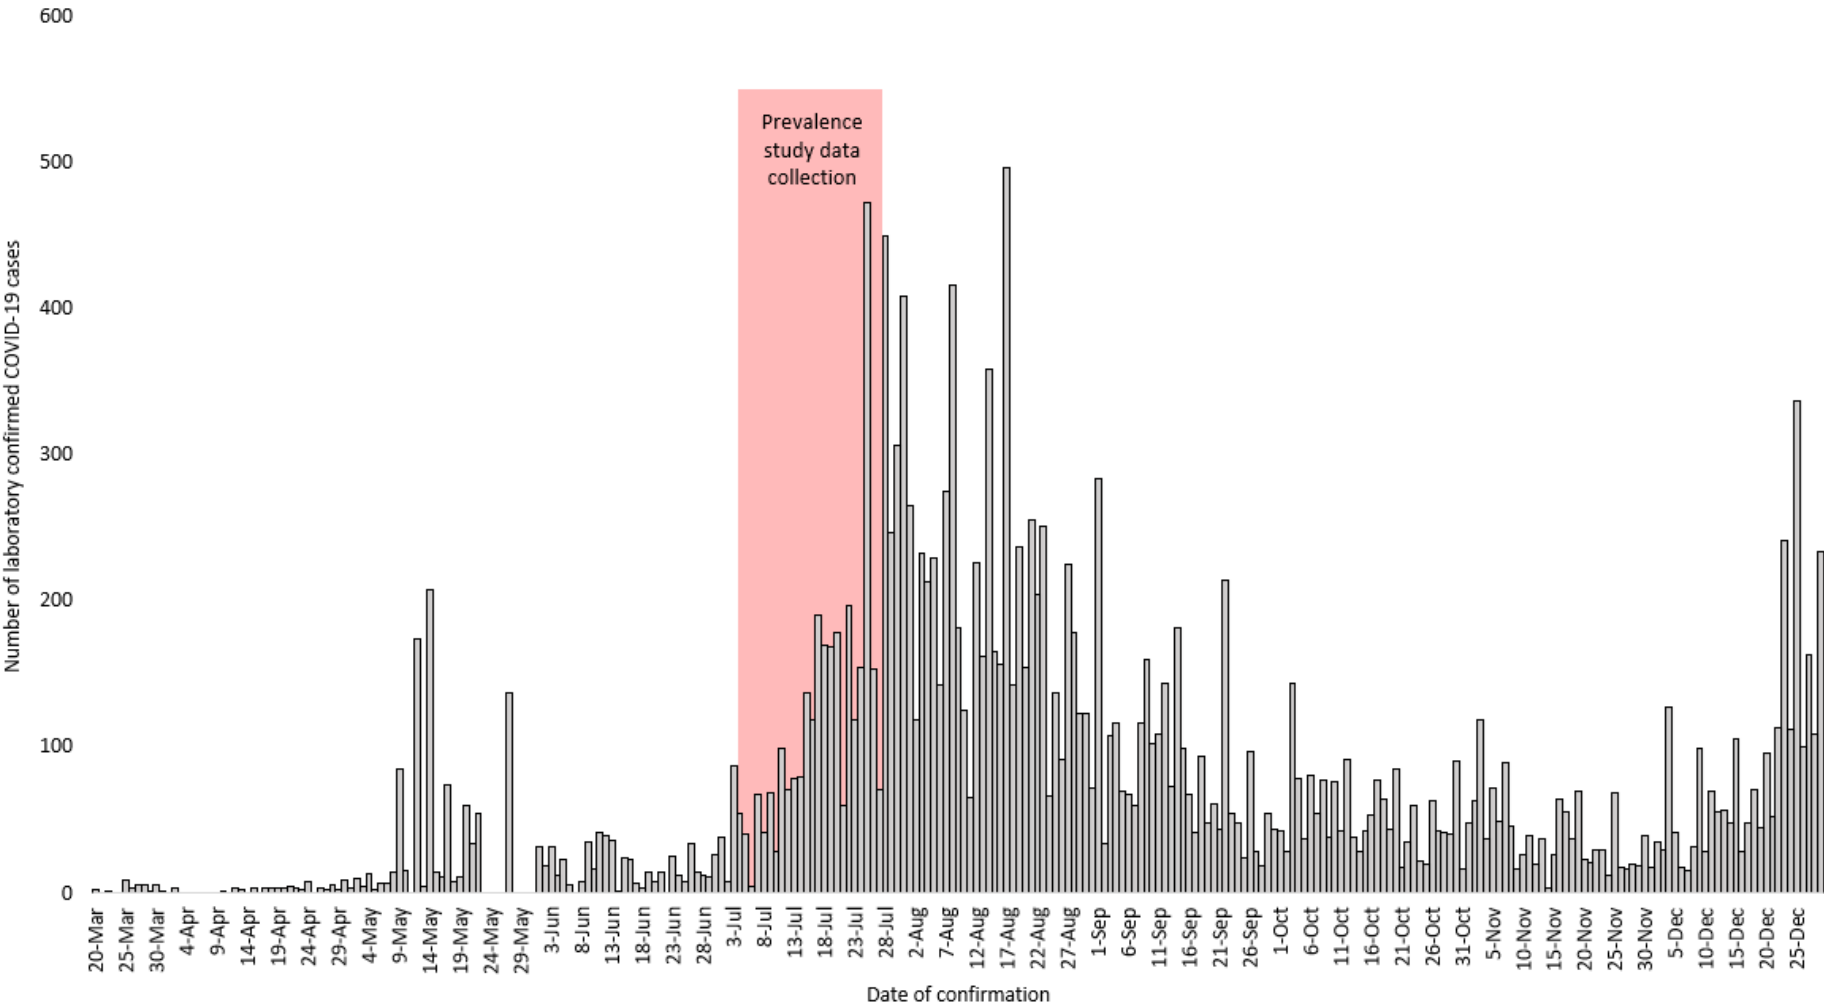

Supplemental Figure 2. Geographic location and data collection time period of SARS-CoV-2 prevalence survey—Zambia, July 2020

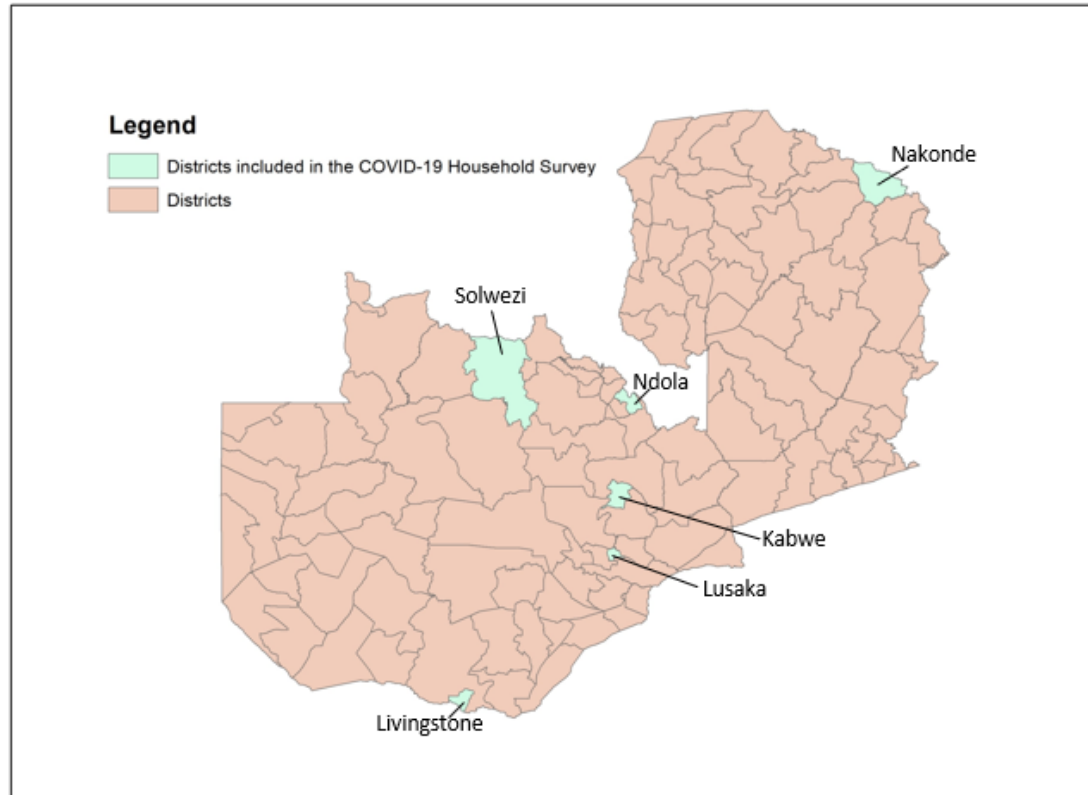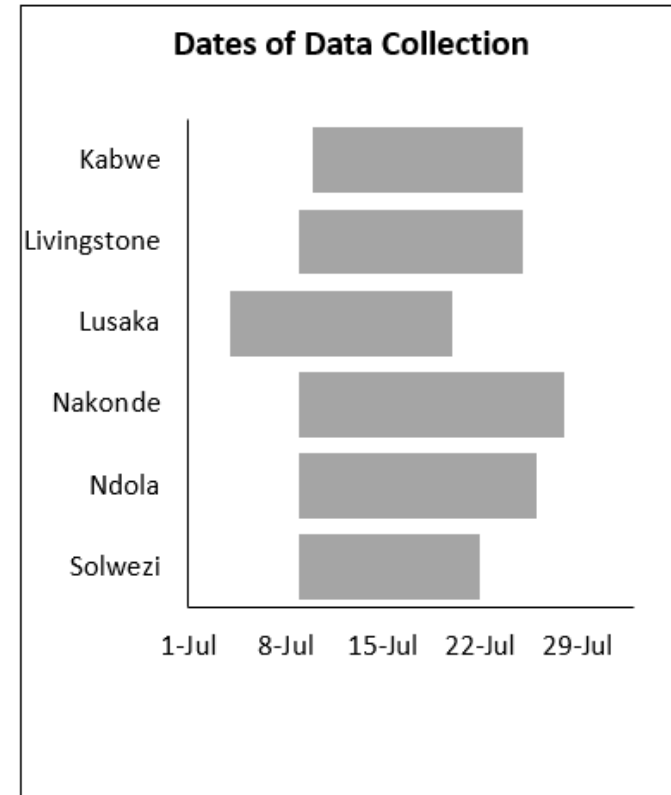

Supplemental Figure 3. Flow diagram of sample sizes in the SARS-CoV-2 prevalence study in six districts in Zambia, July 2020\*

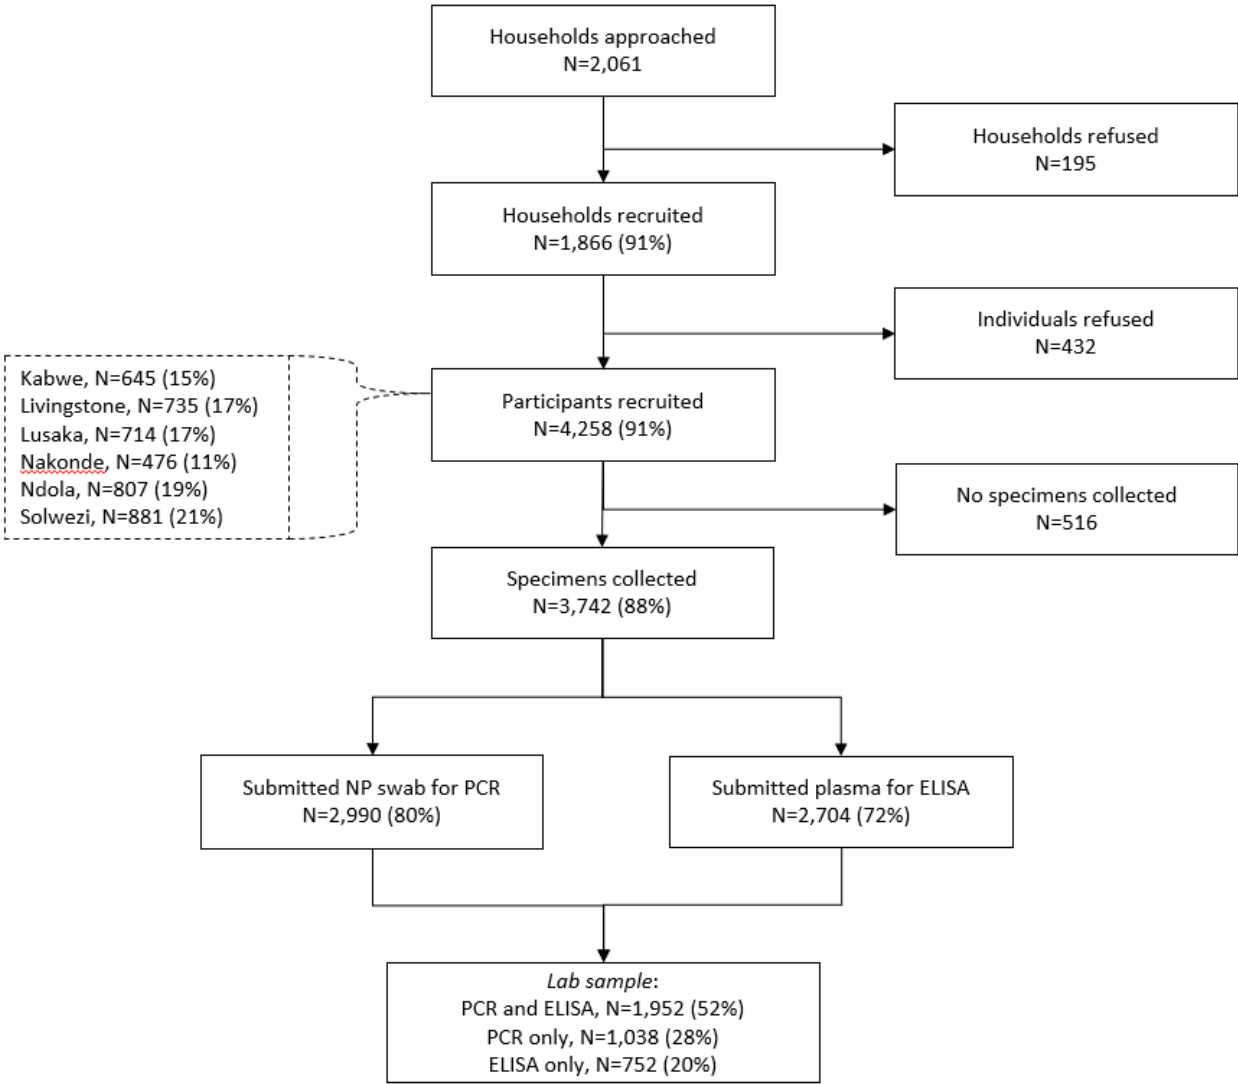

\* Lab results for 333 (8.9% of all lab results) participants were disassociated from their epidemiological data. For these participants, their test results data were calibrated at the district-level age and sex distributions

*Supplemental Table.* Symptomology of persons with symptomatic SARS-CoV-2 infections during SARS-CoV-2 prevalence study — Zambia, July 2020

| <b>Variable</b>                     |                            | <b>% (95% CI)</b> |
|-------------------------------------|----------------------------|-------------------|
| Asymptomatic                        |                            | 76.2 (60.0-92.4)  |
| Symptoms (N=35)                     | Headache                   | 63.6 (13.2-100.0) |
|                                     | Chills                     | 40.9 (0.9-80.9)   |
|                                     | Cough                      | 25.7 (0.0-69.1)   |
|                                     | Rhinorrhea                 | 21.7 (0.0-62.2)   |
|                                     | Fever                      | 16.0 (1.5-30.5)   |
|                                     | Abdominal pain             | 5.3 (0.0-12.4)    |
|                                     | Loss of appetite           | 5.2 (0.0-11.0)    |
|                                     | Nausea or vomiting         | 5.0 (0.0-11.7)    |
|                                     | Fatigue                    | 4.9 (0.0-10.2)    |
|                                     | Arthralgias                | 3.6 (0.0-9.0)     |
|                                     | Chest pain                 | 3.0 (0.0-7.6)     |
|                                     | Myalgias                   | 1.3 (0.0-4.3)     |
|                                     | Sore throat                | 1.3 (0.0-4.3)     |
|                                     | Diarrhea                   | 1.2 (0.0-3.9)     |
|                                     | Decreased taste sensation  | 0.9 (0.0-2.8)     |
|                                     | Decreased smell sensation  | 0.9 (0.0-2.8)     |
|                                     | Dyspnea                    | Not calculated    |
|                                     | Conjunctivitis             | Not calculated    |
|                                     | Wheezing                   | Not calculated    |
|                                     | Other respiratory symptoms | Not calculated    |
|                                     | Nose bleeding              | Not calculated    |
|                                     | Rash                       | Not calculated    |
| Seizure                             | Not calculated             |                   |
| Altered consciousness               | Not calculated             |                   |
| Other neurological symptoms         | Not calculated             |                   |
| Any other symptoms                  | 6.2 (0.0-19.0)             |                   |
| Don't know                          | Not calculated             |                   |
| Symptoms required medical attention |                            | 65.1 (37.9-92.2)  |
| Symptoms required hospitalization   |                            | 5.7 (0.0-12.4)    |
| CI: confidence interval             |                            |                   |
